# Supplementary material for: Effect of the SGLT2 Inhibitor Dapagliflozin on Potassium Levels in Patients with Type 2 Diabetes Mellitus: A Pooled Analysis
Source: PubMed Central journal article supplement — Diabetes Ther. 2016 Jan 12;7(1):125–37. doi: 10.1007/s13300-015-0150-y (PMC4801817; doi:10.1007/s13300-015-0150-y), 2016-01-12
Supplement: 13300_2015_150_MOESM1_ESM.pdf [file 13300_2015_150_MOESM1_ESM.pdf]

SUPPLEMENTARY MATERIAL

Table S1. Studies included in the analysis.

| ClinicalTrials.gov ID               | Study description                              | Treatment arms                                               | Background therapy                                                   |
|-------------------------------------|------------------------------------------------|--------------------------------------------------------------|----------------------------------------------------------------------|
| <i>Placebo controlled pool</i>      |                                                |                                                              |                                                                      |
| <i>Phase IIb studies (12 weeks)</i> |                                                |                                                              |                                                                      |
| NCT00263276 [1]                     | <b>Monotherapy, dose-range</b>                 | DAPA 2.5, 5, 10, 20, 50 mg<br>Placebo<br>MET-XR 750–1,500 mg | Treatment-naïve                                                      |
| NCT00972244 [2]                     | <b>Monotherapy, Japanese patients</b>          | DAPA 1, 2.5, 5, 10 mg<br>Placebo                             | Treatment-naïve                                                      |
| NCT00357370 [3]                     | <b>Add-on to insulin</b>                       | DAPA 10, 20 mg<br>Placebo                                    | Insulin sensitizers (MET ± Thiazolidinedione) + 50% Original insulin |
| <i>Phase III studies (24 weeks)</i> |                                                |                                                              |                                                                      |
| NCT00528372 [4]                     | <b>Monotherapy</b>                             | DAPA 2.5, 5, 10 mg<br>Placebo                                | Treatment-naïve                                                      |
| NCT00528879 [5]                     | <b>Add-on to MET</b>                           | DAPA 2.5, 5, 10 mg<br>Placebo                                | MET ≥1,500 mg/day                                                    |
| NCT00855166 [6]                     | <b>Add-on to MET</b>                           | DAPA 10 mg<br>Placebo                                        | MET ≥1,500 mg/day                                                    |
| NCT00859898 [7]                     | <b>Initial combination with MET</b>            | DAPA 10 mg + MET-XR<br>DAPA 10 mg<br>MET-XR ≤2,000 mg        | Treatment-naïve                                                      |
| NCT00680745 [8]                     | <b>Add-on to sulfonylurea</b>                  | DAPA 2.5, 5, 10 mg<br>Placebo                                | Glimepiride 4 mg/day                                                 |
| NCT00683878 [9]                     | <b>Add-on to thiazolidinedione</b>             | DAPA 5, 10 mg<br>Placebo                                     | Pioglitazone 30 or 45 mg/day                                         |
| NCT00984867 [10]                    | <b>Add-on to sitagliptin</b>                   | DAPA 10 mg<br>Placebo                                        | Sitagliptin 100 mg/day ± MET ≥1,500 mg/day                           |
| NCT00673231 [11]                    | <b>Add-on to insulin</b>                       | DAPA 2.5, 5, 10 mg<br>Placebo                                | Insulin ≥30 IU/day ± maximum 2 OADs                                  |
| NCT01031680 [12]                    | <b>High CV risk add-on to usual care</b>       | DAPA 10 mg<br>Placebo                                        | OADs ± insulin                                                       |
| NCT01042977 [13]                    | <b>High CV risk add-on to usual care</b>       | DAPA 10 mg<br>Placebo                                        | OADs ± insulin                                                       |
| <i>Renal impairment</i>             |                                                |                                                              |                                                                      |
| NCT00663260 [14]                    | <b>52-week moderate renal impairment study</b> | DAPA 5, 10 mg<br>Placebo                                     | Any except MET                                                       |

CV, cardiovascular; DAPA, dapagliflozin; MET, metformin; OAD, oral antidiabetic drug; XR, extended release.

## Supplementary References

1. List JF, Woo V, Morales E, Tang W, Fiedorek FT. Sodium-glucose cotransport inhibition with dapagliflozin in type 2 diabetes. *Diabetes Care* 2009; **32**(4): 650–657. DOI: 10.2337/dc08-1863.
2. Kaku K, Inoue S, Matsuoka O, *et al.* Efficacy and safety of dapagliflozin as a monotherapy for type 2 diabetes mellitus in Japanese patients with inadequate glycaemic control: a phase II multicentre, randomized, double-blind, placebo-controlled trial. *Diabetes Obes Metab* 2013; **15**(5): 432–440. DOI: 10.1111/dom.12047.
3. Wilding JP, Norwood P, T'Joen C, Bastien A, List JF, Fiedorek FT. A study of dapagliflozin in patients with type 2 diabetes receiving high doses of insulin plus insulin sensitizers: applicability of a novel insulin-independent treatment. *Diabetes Care* 2009; **32**(9): 1656–1662. DOI: 10.2337/dc09-0517.
4. Ferrannini E, Ramos SJ, Salsali A, Tang W, List JF. Dapagliflozin monotherapy in type 2 diabetic patients with inadequate glycemic control by diet and exercise: a randomized, double-blind, placebo-controlled, phase 3 trial. *Diabetes Care* 2010; **33**(10): 2217–2224. DOI: 10.2337/dc10-0612.
5. Bailey CJ, Gross JL, Pieters A, Bastien A, List JF. Effect of dapagliflozin in patients with type 2 diabetes who have inadequate glycaemic control with metformin: a randomised, double-blind, placebo-controlled trial. *Lancet* 2010; **375**(9733): 2223–2233. DOI: 10.1016/S0140-6736(10)60407-2.
6. Bolinder J, Ljunggren O, Kullberg J, *et al.* Effects of dapagliflozin on body weight, total fat mass, and regional adipose tissue distribution in patients with type 2 diabetes mellitus with inadequate glycemic control on metformin. *J Clin Endocrinol Metab* 2012; **97**(3): 1020–1031. DOI: 10.1210/jc.2011-2260.
7. Henry RR, Murray AV, Marmolejo MH, Hennicken D, Ptaszynska A, List JF. Dapagliflozin, metformin XR, or both: initial pharmacotherapy for type 2 diabetes, a randomised controlled trial. *Int J Clin Pract* 2012; **66**(5): 446–456. DOI: 10.1111/j.1742-1241.2012.02911.x.
8. Strojek K, Yoon KH, Hrubá V, Elze M, Langkilde AM, Parikh S. Effect of dapagliflozin in patients with type 2 diabetes who have inadequate glycaemic control with glimepiride: a randomized, 24-week, double-blind, placebo-controlled trial. *Diabetes Obes Metab* 2011; **13**(10): 928–938. DOI: 10.1111/j.1463-1326.2011.01434.x.
9. Rosenstock J, Vico M, Wei L, Salsali A, List JF. Effects of dapagliflozin, an SGLT2 inhibitor, on HbA(1c), body weight, and hypoglycemia risk in patients with type 2 diabetes inadequately controlled on pioglitazone monotherapy. *Diabetes Care* 2012; **35**(7): 1473–1478. DOI: 10.2337/dc11-1693.
10. Jabbour SA, Hardy E, Sugg J, Parikh S. Dapagliflozin is effective as add-on therapy to sitagliptin with or without metformin: a 24-week, multicenter, randomized, double-blind, placebo-controlled study. *Diabetes Care* 2014; **37**(3): 740–750. DOI: 10.2337/dc13-0467.
11. Wilding JP, Woo V, Soler NG, *et al.* Long-term efficacy of dapagliflozin in patients with type 2 diabetes mellitus receiving high doses of insulin: a randomized trial. *Ann Intern Med* 2012; **156**(6): 405–415. DOI: 10.7326/0003-4819-156-6-201203200-00003.
12. Cefalu WT. Dapagliflozin Treatment for Type 2 Diabetes Mellitus Patients with Comorbid Cardiovascular Disease and Hypertension. *Diabetes* 2012; **61**(Suppl. 1): Abstr. 1056–P.
13. Leiter LA, Cefalu WT, de Bruin TW, Gause-Nilsson I, Sugg J, Parikh SJ. Dapagliflozin added to usual care in individuals with type 2 diabetes mellitus with preexisting cardiovascular disease: a 24-week, multicenter, randomized, double-blind, placebo-controlled study with a 28-week extension. *J Am Geriatr Soc* 2014; **62**(7): 1252–1262. DOI: 10.1111/jgs.12881.

14. Kohan DE, Fioretto P, Tang W, List JF. Long-term study of patients with type 2 diabetes and moderate renal impairment shows that dapagliflozin reduces weight and blood pressure but does not improve glycemic control. *Kidney Int* 2014; **85**(4): 962–971. DOI: 10.1038/ki.2013.356.
